# Supplementary material for: Reaction of an anthracene-based cyclic phosphonate ester with trimethylsilyl bromide unexpectedly generating two phosphonates: syntheses, crystal structures and fluorescent properties
Source: Royal Society of Chemistry journal article supplement (doi:10.1039/c3ra22863k), 2013-01-01
Supplement: c3ra22863k.pdf [file c3ra22863k.pdf]

## Supporting Information

**Table S1** Selected bond lengths (Å) for **1-3**.

|         | <b>1</b> | <b>2</b> | <b>3</b> |
|---------|----------|----------|----------|
| P1-O1   | 1.574(1) | 1.578(2) | 1.561(4) |
| P1-O2   | 1.558(1) | 1.566(3) | 1.546(4) |
| P1-O3   | 1.457(1) | 1.456(3) | 1.502(4) |
| C1-P1   | 1.829(2) | 1.806(3) | 1.770(6) |
| C1-C2   | 1.521(3) | 1.517(4) | 1.557(7) |
| O2-C18  | 1.455(3) | 1.440(5) | 1.466(7) |
| O1-C16  | 1.446(3) | 1.447(4) |          |
| Br1-C9  |          | 1.902(3) | 1.908(6) |
| Br2-C18 |          |          | 1.930(6) |
| C1-O4   | 1.400(3) |          |          |

**Table S2** Fluorescence lifetimes of **1-3** in CH<sub>2</sub>Cl<sub>2</sub> solution and in solid state.

| In solution              | <b>1</b>                 |     |     | <b>2</b> |      |          | <b>3</b> |      |      |
|--------------------------|--------------------------|-----|-----|----------|------|----------|----------|------|------|
|                          | Emission (nm)            | 399 | 420 | 445      | 412  | 434      | 458      | 413  | 436  |
| Lifetime (ns)            | 2.4                      | 2.2 | 2.2 | 0.78     | 0.68 | 0.72     | 0.72     | 0.71 | 0.71 |
| In solid state           | <b>1</b>                 |     |     | <b>2</b> |      | <b>3</b> |          |      |      |
|                          | Emission (nm)            | 438 | 456 | 476      | 496  | 449      | 475      | 483  |      |
|                          | Lifetime (ns, $\tau_1$ ) | 1.7 | 1.4 | 0.86     | 0.94 | 0.53     | 0.65     | 0.73 |      |
| Lifetime (ns, $\tau_2$ ) | 4.6                      | 4.6 | 2.4 | 3.2      | 3.3  | 3.8      | 3.8      |      |      |

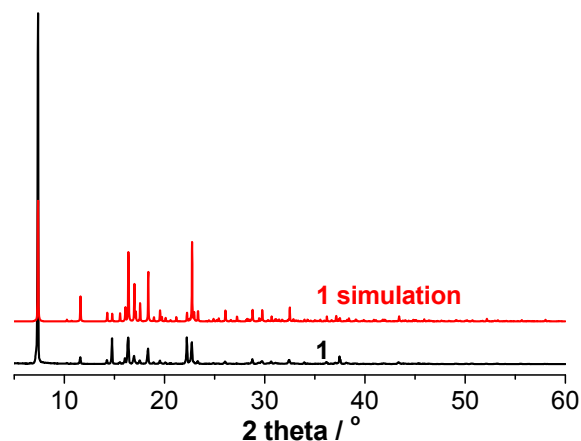

**Fig. S1** Experimental and simulated XRD patterns of **1**.

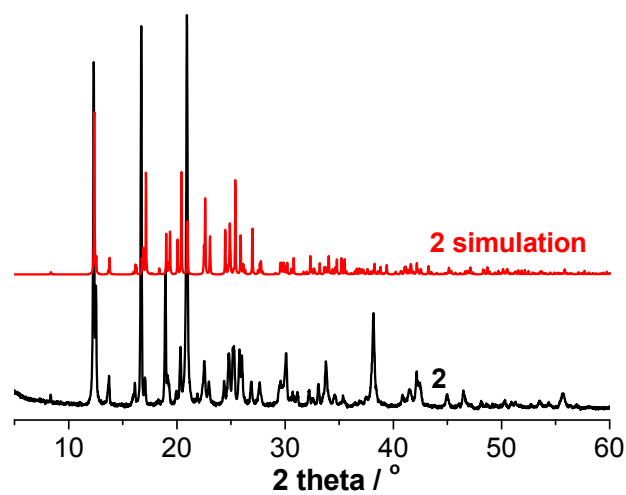

**Fig. S2** Experimental and simulated XRD patterns of **2**.

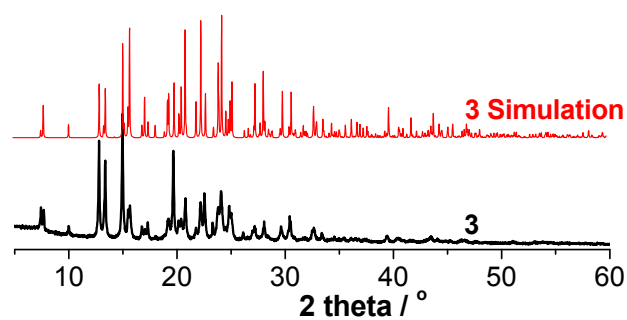

**Fig. S3** Experimental and simulated XRD patterns of **3**.

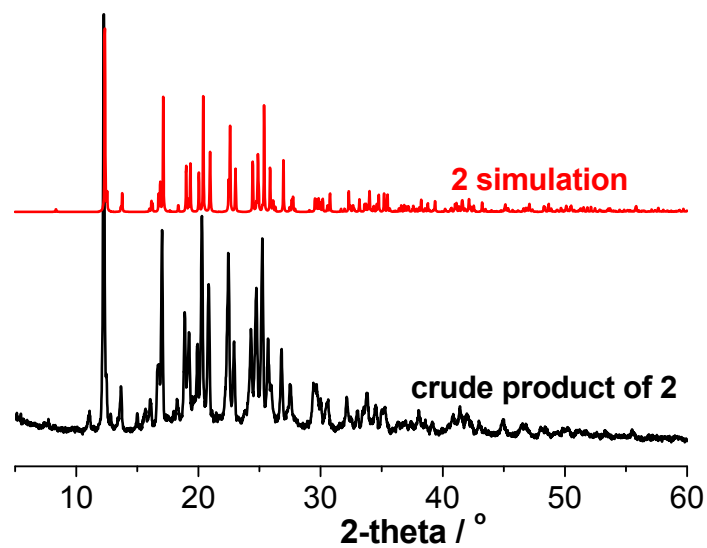

**Fig. S4** The XRD pattern for the crude product of **2** obtained from the dry  $\text{CH}_3\text{CN}$  solution, and the simulated XRD pattern.

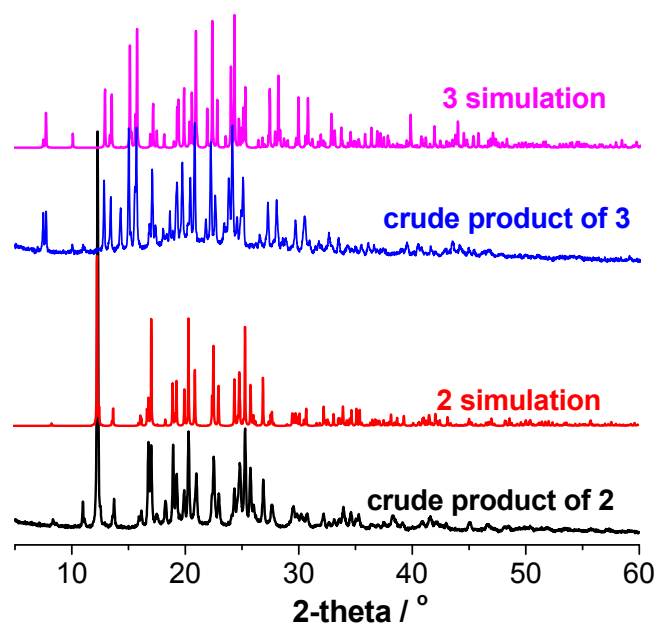

**Fig. S5** The XRD patterns for the crude products of **2** and **3** obtained from the isolation with High-Preparative Liquid Chromatography, and their simulated XRD patterns.

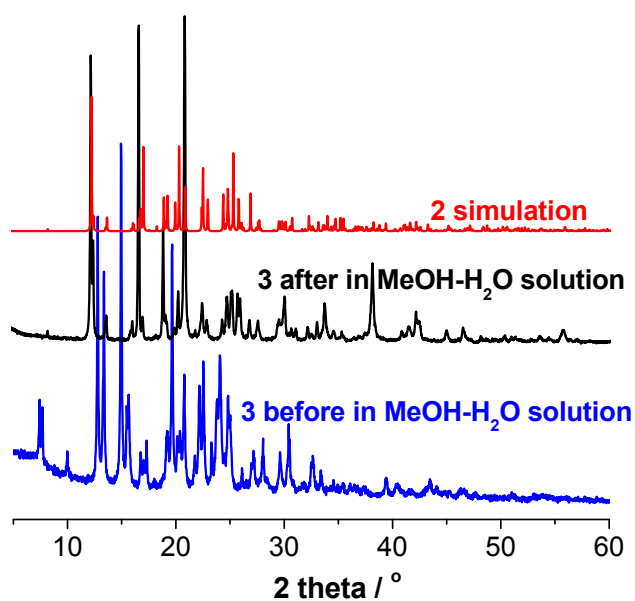

**Fig. S6** The XRD patterns of **3** before and after staying in CH<sub>3</sub>OH-H<sub>2</sub>O solution, and the simulated XRD pattern of **2**.

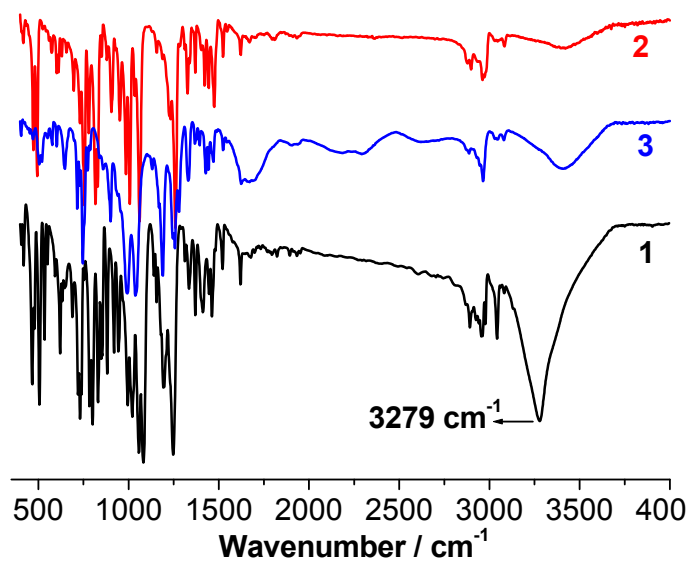

Fig. S7 IR spectra of 1 - 3.

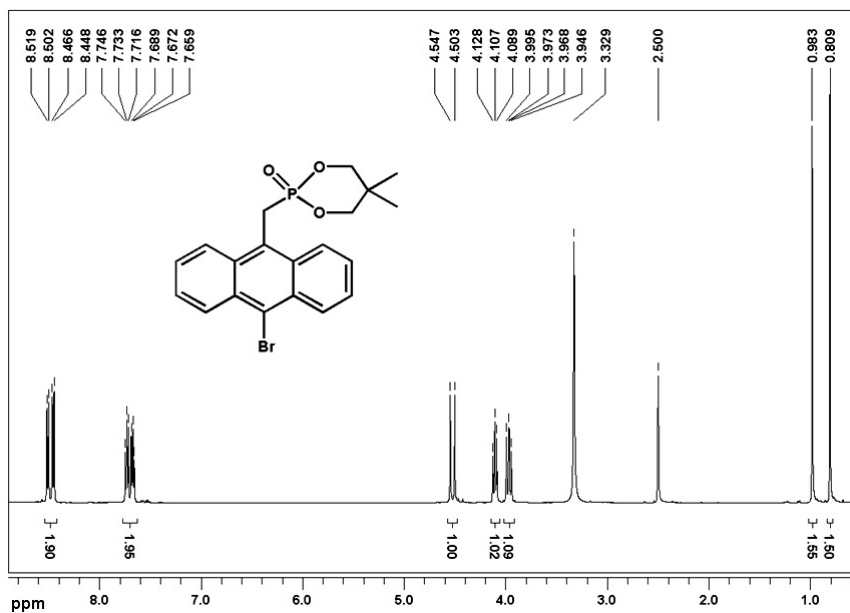

Fig. S8  $^1\text{H}$  NMR spectrum of 2 (500 MHz,  $\text{DMSO}-d_6$ ).

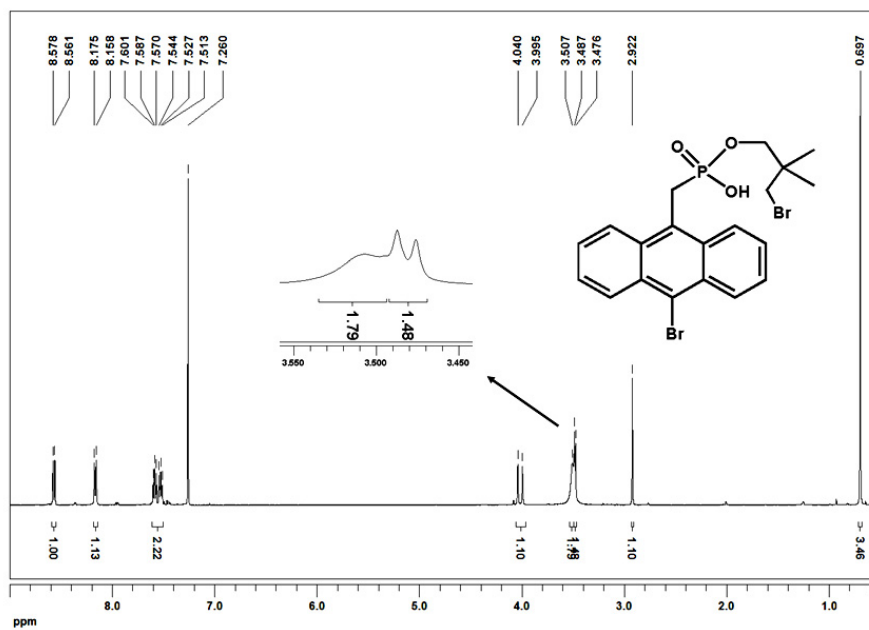

**Fig. S9**  $^1\text{H}$  NMR spectrum of **3** (500 MHz,  $\text{CDCl}_3$ ).
